# Supplementary material for: Synthesis and basic catalytic application of Pd nanoparticles supported on 3D nitrogen-doped reduced graphene oxide
Source: Royal Society of Chemistry journal article supplement (doi:10.1039/c6nj02304e), 2016-12-17
Supplement: c6nj02304e1.pdf [file c6nj02304e1.pdf]

## Supplementary Materials

### Synthesis and basic catalytic application of Pd nanoparticles supported on 3D nitrogen-doped reduced graphene oxide

Xiang Liu <sup>a,b</sup>, Xiaohua Zhao <sup>c,\*</sup>, Yuanyuan Cao <sup>a</sup>, Ting Li <sup>a</sup>, Shu Qiu <sup>a</sup>, Qiuzhong Shi <sup>a</sup>

<sup>a</sup> Institute of Chemical and Materials Engineering, Zhenjiang College, Zhenjiang 212000, China.

<sup>b</sup> Biofuels Institute of Jiangsu University, Zhenjiang 212013, China.

<sup>c</sup> School of Materials Science and Engineering, Jiangsu University, Zhenjiang 212013, China.

Email: Zhao12\_19@163.com

#### Experimental section

##### Materials

All chemical reagents were of analytical grade and were used as received. GO were prepared according to a modified Hummers' method.

##### Preparation of 3D-NrGO

In a typical experiment, 10 mL GO (10 mg L<sup>-1</sup>) aqueous dispersion with 1 mL formaldehyde solution (37% wt), 200 mg melamine and 400 mg FeCl<sub>3</sub>·6H<sub>2</sub>O was sonicated for 20 min. Subsequently, the stable suspension was transferred and sealed into a 50 mL Teflon-lined stainless steel autoclave, heated at 180 °C for 24 h, and then cooled to room temperature naturally. After that, the obtained three-dimensional graphene hydrogel was treated by freeze-drying for 12 h. After heating the freeze-dried graphene gel at 850 °C for 2h with a heating speed of 5 °C/min under Ar atmosphere, the 3D nitrogen-doped reduced graphene oxide composite (3D-NrGO) was obtained by removing the Fe<sub>2</sub>O<sub>3</sub> with 8M HCl and washing the residue until pH is equal to 7.0.

##### Preparation of 3D-NrGO/Pd

In a typical experiment, 2 mL  $\text{H}_2\text{PdCl}_6$  solution (5 mg/mL) was added into 20 mL PEG200 to form a homogeneous mixture, and then the above 50 mg 3D-NrGO was added into the above mixture and dispersed. The dispersion was kept for 24 h at 100 °C. After steps of rinsing with ethanol and drying in air, the resultant Pd NP-decorated 3D-NrGO composite was obtained, and denoted as 3D-NrGO/Pd. The product was collected by centrifugation and washed with EtOH three times. The content of Pd was estimated to be 8.1 wt% based on ICP-MS.

### Suzuki Reduction Catalyzed by 3D-NrGO/Pd

Aryl halide (1.0 mmol), arylboronic acid (1.2 mmol),  $\text{K}_2\text{CO}_3$  (2.5 mmol), and 1.5 mg of 3D-NrGO/Pd were added to the vessel with 6 mL water/EtOH (v/v=1/2). The mixture was continuously stirred at 60 °C for the desired time until complete consumption of the starting aryl halide. The reaction progress was monitored by GC at a fixed time interval. After the reaction, the catalyst was filtered from the mixture, washed by deionized water and absolute alcohol, and then dried in vacuum at 60 °C overnight. The product was extracted with diethyl ether and determined by GC, which using n-decane as the internal standard.

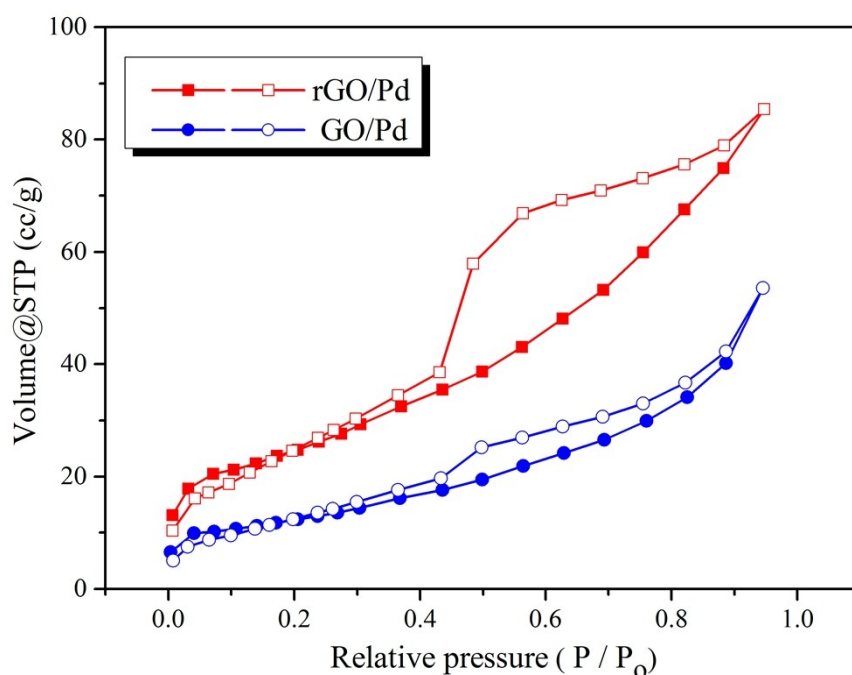

Fig. S1 (a)  $\text{N}_2$  adsorption-desorption isotherms of rGO/Pd and GO/Pd composites

### Characterization of Products

**4-nitrobiphenyl (Table 2, entry 1, 4 and 8):**

Pale yellow solid,  $^1\text{H}$  NMR (300 MHz,  $\text{CDCl}_3$ ):  $\delta$  (ppm): 8.30 (d,  $J = 8.2$  Hz, 2H), 7.73 (d,  $J = 8.9$  Hz, 2H), 7.64-7.61 (m, 2H), 7.53-7.42 (m, 3H).

(Known compound, CAS 92-93-3, see: V. Percec, G.M. Golding, J. Smidrkal, O. Weichold, *J. Org. Chem.*, **2004**, *69*, 3447.).

**Biphenyl (Table 2, entry 2 and 9):**

White solid; mp 69-70 °C (lit. 72 °C),  $^1\text{H}$  NMR (300 MHz,  $\text{CDCl}_3$ ):  $\delta$  7.38 (t,  $J = 7.2$  Hz, 2H), 7.47 (t,  $J = 22.0$  Hz, 4H), 7.63 (d,  $J = 8.0$  Hz, 4H).

(Known compound, CAS 92-52-4, see: Oncel, Nurdal et al. *Journal of Organometallic Chemistry*, 2016, 811, 81-90).

**4-methoxybiphenyl (Table 2, entry 3):**

White solid,  $^1\text{H}$  NMR (300 MHz,  $\text{CDCl}_3$ ):  $\delta$  (ppm): 7.57-7.52 (m, 4H), 7.45-7.40 (m, 2H), 7.33-7.26 (m, 1H), 6.98 (m, 2H), 3.86 (s, 3H).

(Known compound, CAS 613-37-6, see: E. Shirakawa, Y. Hayashi, K.I. Itoh, R. Watabe, N. Uchiyama, W. Konagaya, S. Masui, T. Hayashi, *Angew. Chem. Int. Ed.*, **2012**, *51*, 218.).

**4-Cyanobiphenyl (Table 2, entry 5)**

White solid; mp 83-85 °C (lit. 83-84 °C);  $^1\text{H}$  NMR (300 MHz,  $\text{CDCl}_3$ ):  $\delta$  7.39-7.45 (m, 1H), 7.45-7.53 (m, 2H), 7.55-7.63 (m, 2H), 7.64-7.77 (m, 4H).

(Known compound, CAS 2920-38-9, see: Garel, Claire et al. *Applied Catalysis, A: General*, 2015, 504, 272-286)

**3-Methyl-biphenyl (Table 2, entry 6)**

$^1\text{H}$  NMR (300 MHz,  $\text{CDCl}_3$ ):  $\delta$  7.58 (d,  $J = 7.6$  Hz, 2H), 7.42 (m, 4H), 7.33 (t,  $J = 7.4$  Hz, 2H), 7.16 (d,  $J = 7.4$  Hz, 1H), 2.42 (s, 3H).

(Known compound, CAS 643-93-6, see: Giacalone, Francesco et al. *ACS Nano*, 2016 10(4), 4627-4636)

**2-Methyl-biphenyl (Table 2, entry 7)**

$^1\text{H}$  NMR (300 MHz, DMSO):  $\delta$  7.45 (t,  $J = 7.3$  Hz, 2H), 7.41-7.22 (m, 6H), 7.22-7.15 (m, 1H), 2.23 (s, 3H).

(Known compound, CAS 643-58-3, see: Oncel, Nurdal et al. *Journal of*

Organometallic Chemistry, 2016, 811, 81-90)
